# Supplementary material
Source: ML conference proceedings conference paper supplement (https://openaccess.thecvf.com/content/ACCV2022/html/Alhawwary_PatchFlow_A_Two-Stage_ACCV_2022_paper.html)
Supplement: Supplementary file 2 [file Alhawwary_PatchFlow_A_Two-Stage_ACCV_2022_supplemental.zip]

Archive with 3 entries (2 files):
- 0744_supp/
- 0744_supp/ACCV2_Suppl_material_final.pdf
- 0744_supp/DEMO Video.mp4
